# Supplementary material for: Copper nanoparticles spaced 3D graphene films for binder-free lithium-storing electrodes
Source: Royal Society of Chemistry journal article supplement (doi:10.1039/c6ta01347c), 2016-01-01
Supplement: c6ta01347c1.pdf [file c6ta01347c1.pdf]

## Supporting Information

### **Copper nanoparticles spaced 3D graphene films for binder-free lithium-storing electrodes**

Dong-Jie Guo,<sup>a</sup> Zi-Ying Wei,<sup>a</sup> Bo Shi,<sup>b</sup> Shi-Wen Wang,<sup>a</sup> Li-Zhen Wang,<sup>a</sup> Wei Tan<sup>c</sup> and  
Shao-Ming Fang<sup>\*a</sup>

<sup>a</sup> State Laboratory of Surface & Interface, Zhengzhou University of Light Industry,  
Zhengzhou, China, 450002

<sup>b</sup> College of Energy and Power Engineering, Nanjing University of Aeronautics and  
Astronautics, Nanjing, China, 210016

<sup>c</sup> Department of Mechanical Engineering, University of Colorado, Boulder, USA,  
80309

\* Corresponding Author, Correspondence should be sent to: [mingfang@zzuli.edu.cn](mailto:mingfang@zzuli.edu.cn)

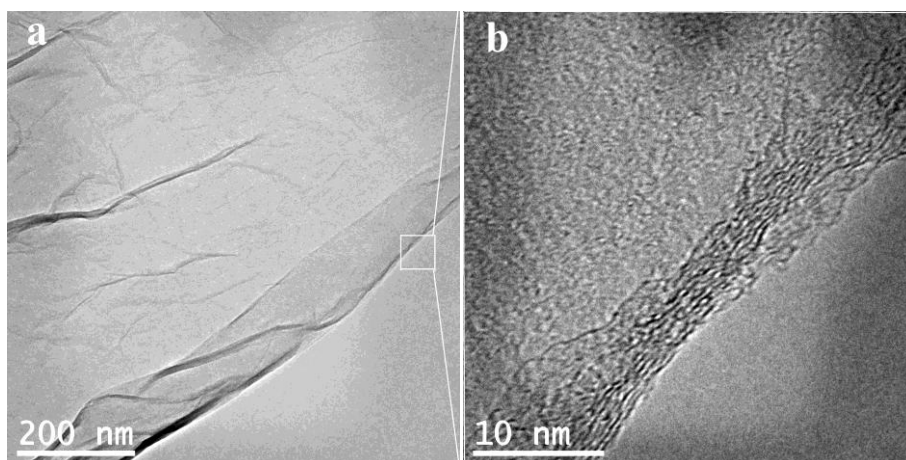

**Figure S1.** *a* is a TEM image of GO flake with a flexible sheet structure and small wrinkles on the surface, *b* is its HRTEM image shows that there are 8-13 layers of GO flakes stacking at the edge.

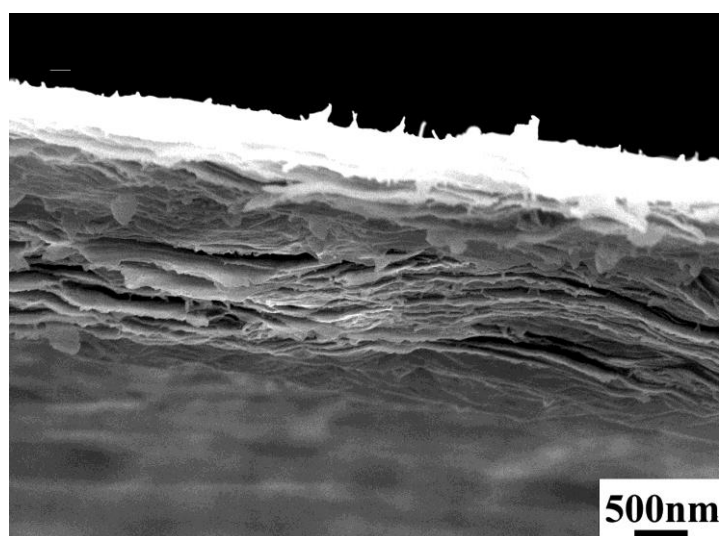

**Figure S2.** Cross-sectional SEM view of GO-EPD film. The entire film is around 2  $\mu\text{m}$  thick, showing a highly porous texture.

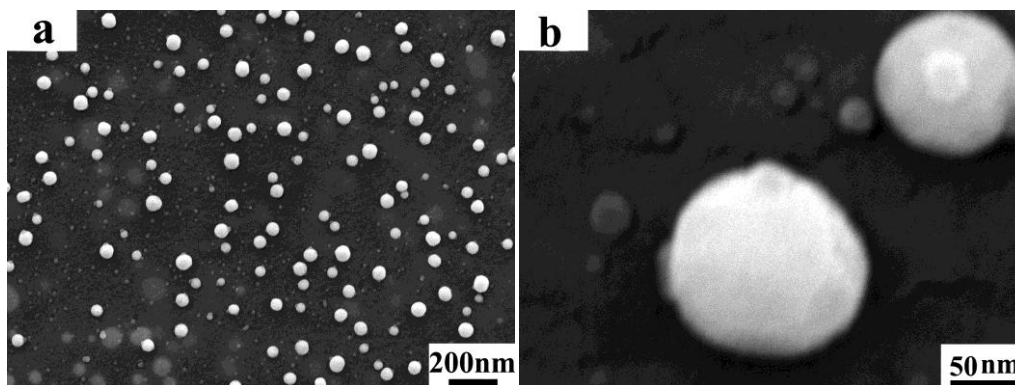

**Figure S3.** Top-view SEM images of the rGO/Cu NPs 700 with magnification of 10,000 (a) and 300,000 (b) times. *a* shows that a large number of Cu NPs uniformly distribute on the graphene surface, some Cu NPs locate below the surface, showing light white color; *b* shows high resolution images of spherical Cu NPs and un-grown Cu NPs.

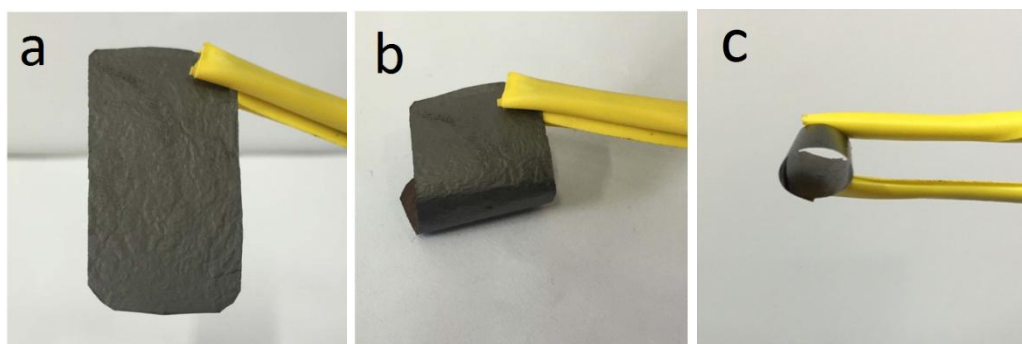

**Figure S4.** Optical images of graphene composite “tube”. A sample of rGO/Cu NPs 700 film was put into a package by a tweezer.

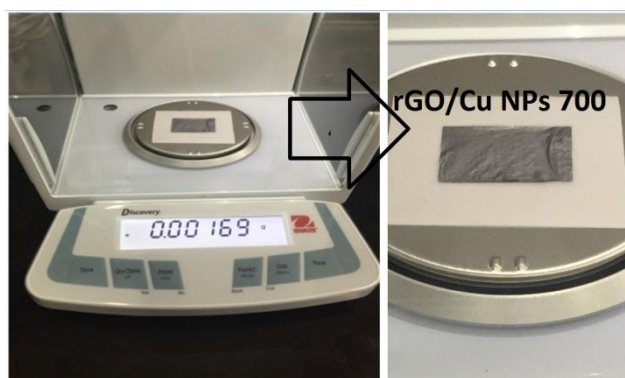

**Figure S5.** Demonstration of the measurement of the sample mass. A balance (Ohaus Discovery, DV215CD) with a sensitivity of 0.0001g was used to determine the mass of graphene electrode. The displayed value of 1.69 mg was the net mass of rGO/Cu NPs 700 membrane with an area of 6.25 cm<sup>2</sup>. To obtain accurate measurement with the balance, a sample with a larger area was measured, which was used to determine the mass per unit area. Therefore, the mass of an electrode with an area of 1.18 cm<sup>2</sup> can be obtained by calculation.

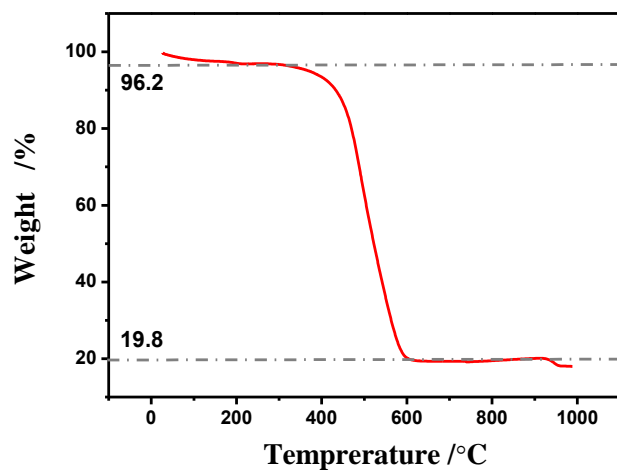

**Figure S6.** Thermogravimetric curve of rGO/Cu NPs 700 film. Under O<sub>2</sub> atmosphere, graphene skeleton completely decomposes at 616 °C. After full removal of C element, Cu element remains. Therefore, the mass ratio of Cu element is 15.6%.

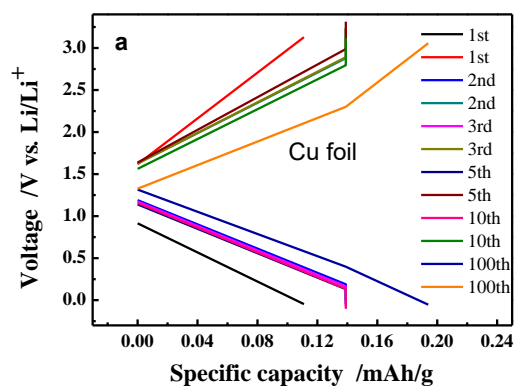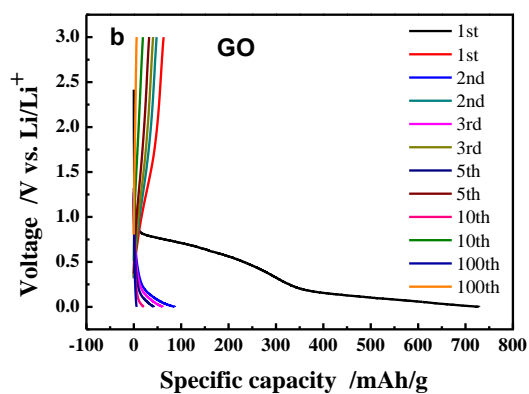

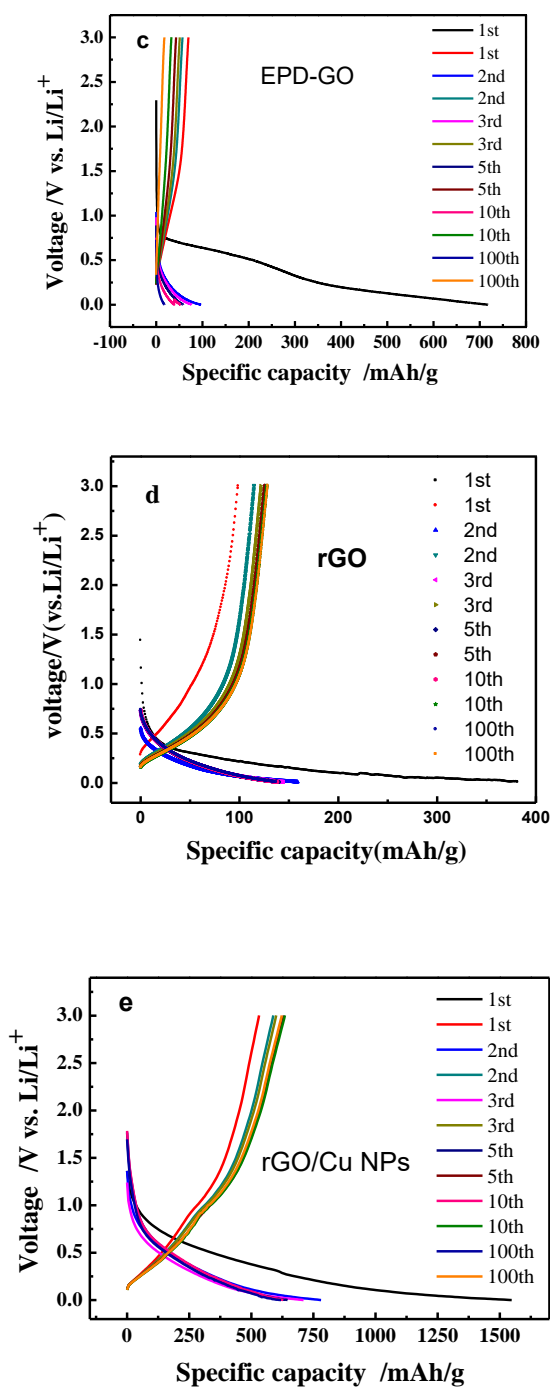

**Figure S7.** The 1<sup>st</sup>, 2<sup>nd</sup>, 3<sup>rd</sup>, 5<sup>th</sup>, 10<sup>th</sup>, and 100<sup>th</sup> cycles of the Cu foil (a), GO (b), GO-EPD (c), rGO (d), and rGO/Cu NPs 700 (e) films at a current density of 0.2 A/g (vs Li/Li<sup>+</sup>).

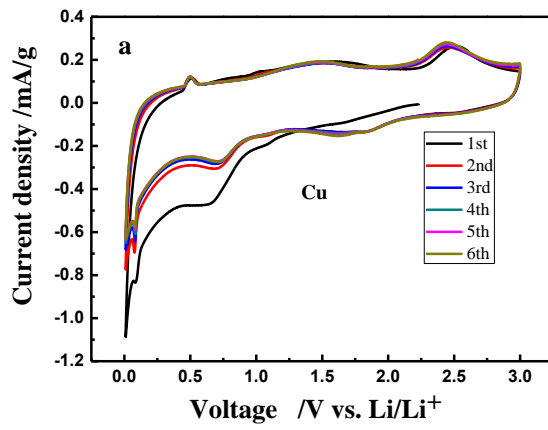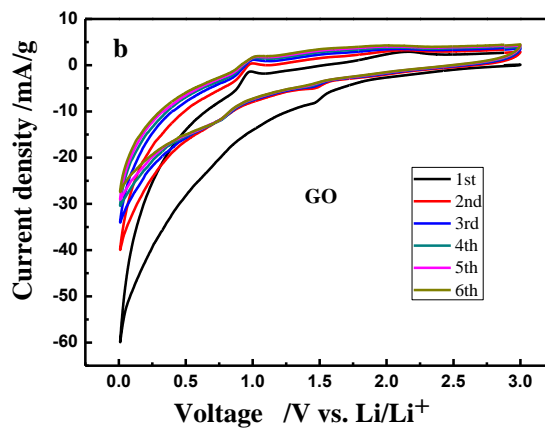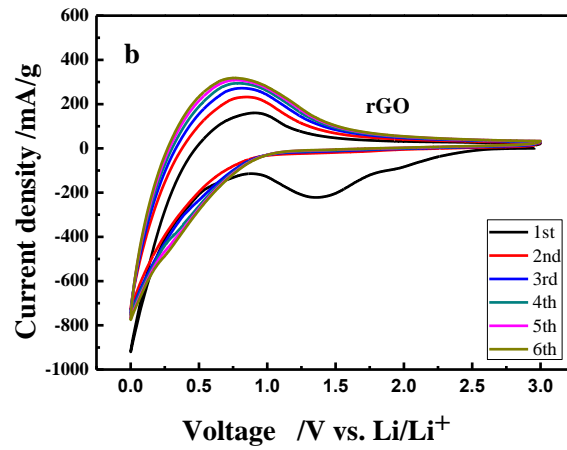

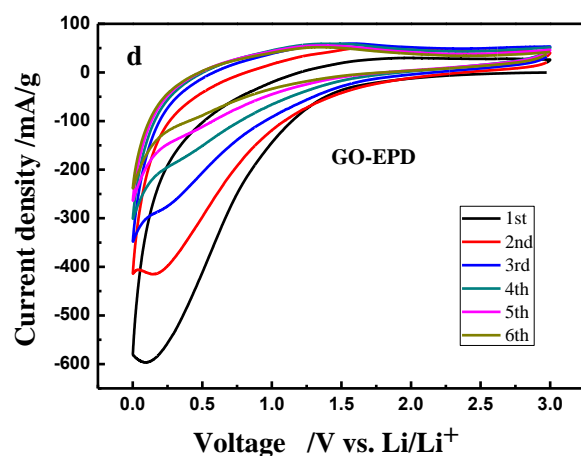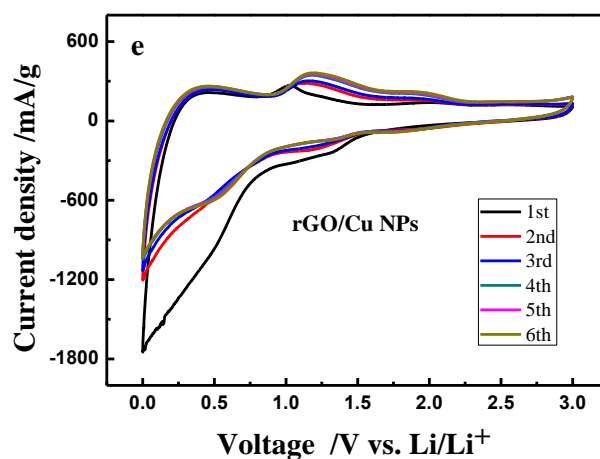

**Figure S8.** Cyclic voltammogram curves of the Cu foil (a), GO (b), rGO (c), GO-EPD (d), and rGO/Cu NPs 700 (e) films at a scan rate of  $0.1 \text{ mVs}^{-1}$ .

**Table S1.** Mass and size parameter of battery electrode

|                | Film mass /mg | film size /cm <sup>2</sup> | mass per unit area /mg/cm <sup>2</sup> | radius of electrode /cm | electrode area /cm <sup>2</sup> | mass of electrode /mg |
|----------------|---------------|----------------------------|----------------------------------------|-------------------------|---------------------------------|-----------------------|
| GO             | 6.12          | 14.21                      | 0.431                                  | 0.613                   | 1.18                            | 0.508                 |
| rGO            | 4.32          | 13.25                      | 0.326                                  | 0.613                   | 1.18                            | 0.384                 |
| GO-EPD         | 3.53          | 12.23                      | 0.289                                  | 0.613                   | 1.18                            | 0.341                 |
| rGO/Cu NPs 400 | 2.02          | 6.72                       | 0.301                                  | 0.613                   | 1.18                            | 0.355                 |
| rGO/Cu NPs 550 | 2.33          | 8.20                       | 0.284                                  | 0.613                   | 1.18                            | 0.335                 |
| rGO/Cu NPs 700 | 1.69          | 6.25                       | 0.270                                  | 0.613                   | 1.18                            | 0.319                 |
| rGO/Cu NPs 850 | 2.01          | 7.78                       | 0.258                                  | 0.613                   | 1.18                            | 0.304                 |

**Table S2.** Surface area, pore volume, and other related parameters of graphene families derived from nitrogen porosimetry analyses.

|               | sample mass /g | surface area /m <sup>2</sup> /g | mean pore size /nm | pore capacity /cm <sup>3</sup> /g | adsorption type |
|---------------|----------------|---------------------------------|--------------------|-----------------------------------|-----------------|
| GO            | 0.1086         | 9.61                            | 26.676             | 0.063                             | Type IV         |
| rGO           | 0.1305         | 5.29                            | 14.922             | 0.020                             | Type IV         |
| GO-EPD        | 0.1298         | 3.36                            | 33.075             | 0.041                             | Type IV         |
| rGO/CuNPs 400 | 0.1414         | 28.19                           | 36.854             | 0.175                             | Type IV         |
| rGO/CuNPs 550 | 0.1913         | 25.54                           | 41.750             | 0.184                             | Type IV         |
| rGO/CuNPs 700 | 0.1568         | 22.25                           | 49.308             | 0.204                             | Type IV         |
| rGO/CuNPs 850 | 0.1378         | 21.01                           | 45.940             | 0.216                             | Type IV         |

**Table S3.** Interlayer spaces of graphene families. The interlayer distance between crystalline planes is calculated by the following Bragg's equation:  $2d\sin\theta=n\lambda$ ; where,  $d$ : interlayer distance,  $\theta$ : scattering angle,  $\lambda$ : wavelength of incident X-ray (= 1.54 Å).

| Samples       | $\lambda$ | $\theta$ | $\sin\theta$ | d /nm  |
|---------------|-----------|----------|--------------|--------|
| GO            | 0.154     | 5.855    | 0.1020       | 0.7503 |
| GO-EPD        | 0.154     | 5.905    | 0.1028       | 0.7412 |
| rGO           | 0.154     | 12.905   | 0.2233       | 0.3448 |
| rGO/CuNPs 400 | 0.154     | 12.051   | 0.2087       | 0.3694 |
| rGO/CuNPs 550 | 0.154     | 12.554   | 0.2173       | 0.3544 |
| rGO/CuNPs 700 | 0.154     | 12.646   | 0.2189       | 0.3517 |
| rGO/CuNPs 850 | 0.154     | 12.714   | 0.2201       | 0.3499 |
| NFG           | 0.154     | 13.091   | 0.2265       | 0.3390 |
